# Supplementary material for: Nanoparticle catalyzed hydrodesulfurization of diesel fuel in a trickle bed reactor: experimental and optimization study
Source: Royal Society of Chemistry journal article supplement (doi:10.1039/d0ra05748g), 2020-01-01
Supplement: d0ra05748g1.pdf [file d0ra05748g1.pdf]

**Table Captions**

**Table S1: Specifications of gamma-alumina nanoparticle**

**Table S2: Properties of diesel fuel (feedstock).**

**Table S3: Operating variable of the HDS process.**

**Table S4: Standards heat of formation for each component.**

**Table S5: Different values of ( $L_r/d_p$ ) ratio[58].**

**Table S6: Characteristics of homemade CoMo/ $\gamma$ -Al<sub>2</sub>O<sub>3</sub> nanocatalyst**

**Table S1.**

| Specification                    | Gamma Alumina nanoparticle |
|----------------------------------|----------------------------|
| Pore volume(cm <sup>3</sup> /g)  | 1.5                        |
| Bulk density(g/cm <sup>3</sup> ) | 0.333                      |
| Surface area(m <sup>2</sup> /g)  | 487                        |
| Particle shape                   | Sphere                     |
| Particle size (nm)               | 20                         |

**Table S2.**

| Property                                         | Value  | Property                | value |
|--------------------------------------------------|--------|-------------------------|-------|
| Specific gravity@15.5°C                          | 0.8333 | API at 60F              | 38.31 |
| Kinematic Viscosity@40°C<br>mm <sup>2</sup> /sec | 3.15   | Initial boiling point°C | 165   |
| Flash point,( °C)                                | 61     | Distillation,( °C)      | ..... |
| DBT (ppm)                                        | 9      | 10%                     | 202   |
| Cetane Index                                     | 53.9   | 50%                     | 276   |
| Colour                                           | 0.9    | 90%                     | 338   |
| Pour point, ( °C)                                | < -20  | Final boiling point°C   | 357   |

**Table S3.**

| Parameters                               | Range            |
|------------------------------------------|------------------|
| Temperature (°C)                         | 250-350          |
| Pressure (bar)                           | 6-10             |
| LHSV (h <sup>-1</sup> )                  | 1-3              |
| The objective function is DBT conversion | 0-optimum value% |

**Table S4**

| Component      | $\Delta H_{fi}^{\circ}$ , KJ/mol. K |
|----------------|-------------------------------------|
| $C_{12}H_{8}S$ | 120.30                              |
| $H_2$          | 0                                   |
| $C_{12}H_{10}$ | 98.2                                |
| $H_{2}S$       | -20.1                               |

**Table S5**

| $L_r/d_p$ | Application                                                                                               |
|-----------|-----------------------------------------------------------------------------------------------------------|
| >25       | To minimize axial dispersion in packed towers                                                             |
| >30       | For long isothermal reactor                                                                               |
| >30       | Axial dispersion and axial heat conduction can be neglected ensuring that plug flow is closely approached |
| >100      | To avoid back mixing in a fixed bed reactor                                                               |
| >350      | Back mixing is minimum                                                                                    |

**Table S6**

| <b>Property</b>                            | <b>Method</b> | <b><math>\gamma</math>-Al<sub>2</sub>O<sub>3</sub></b> | <b>CoMo/<math>\gamma</math>-Al<sub>2</sub>O<sub>3</sub></b> |
|--------------------------------------------|---------------|--------------------------------------------------------|-------------------------------------------------------------|
| <b>Total surface area, m<sup>2</sup>/g</b> | BET           | 500                                                    | 435.55                                                      |
| <b>Pore volume, cm<sup>3</sup>/g</b>       | BJH           | 1.5                                                    | 0.941                                                       |
| <b>Average pore diameter, nm</b>           | BJH           | 20                                                     | 38.99                                                       |

## **Appendix I: TBR Unit description**

This unit is a fully automated, trickle bed reactor. It is a set of catalyst activity detection devices. This unit is made up of Zhejiang Finetec instrument company full technical exchanges and consultation with the research group of the present work. Figure A.1 shows the experimental setup of this unit.

The unit consists of a feed system, pretreatment system, reaction system, gas-liquid separation system, the collection system, voltage regulation system, and control system. Two-way gas from an interface access device, through a filter for dewatering of impurities, a pressure reducing valve and pressure relief, and mass flowmeter control measurement through the one-way valve, two lines of the gases were mixed and flowed into the air preheater. Two-way liquid valve was used to regulate the flow of the liquid feedstock. After passing through a condensate gas-liquid separator, the hydrotreated diesel fuel was collected. A sample of the treated diesel fuel was passed through the backpressure valve or access to the gas chromatography for further analysis.

This TBR unit is manufactured by the Zhejiang Finetec instrument company, China. The unit composes of the following parts;

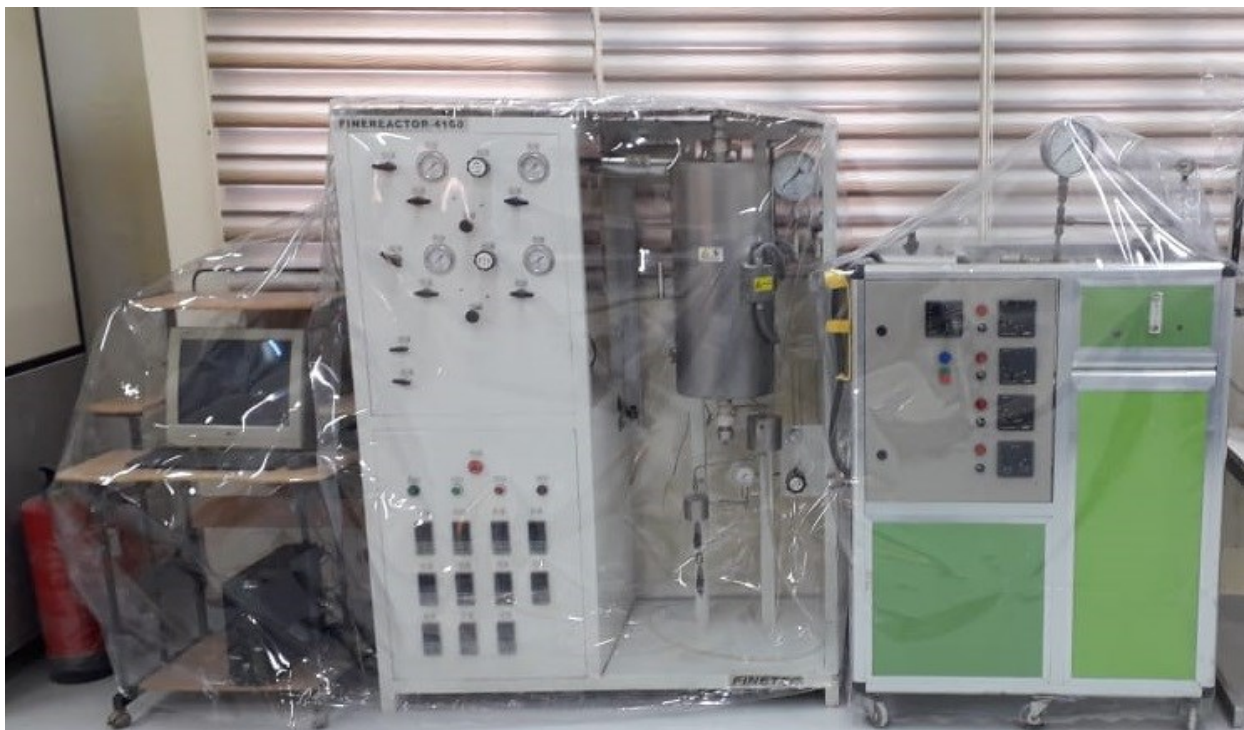

**Figure A.1.** Experimental setup of the TBR Unit

**A.1 Control system:** This device is controlled by the control system of the experimental rig. The reaction streams are composed of two-road gas, two- road liquid. The device is controlled by a secondary instrument control system, which was used to regulate reaction temperature, gas flow rate, liquid flow rate, and operating pressure.

### **A.2 Reactor**

The reactors a full range of material selection of 316 L stainless steel; catalyst loading quantity is 100 ml. Inside diameter is 25mm, interpolation thermowells, and reactor pressure is 10 MPa (100 atm).

### **A.3 Furnace**

The reactor is based on the micro characteristics of the unique design of the heating furnace, the max temperature reached is 500 °C, temperature control of error  $\pm 1^{\circ}\text{C}$ . The reactor

uses an open layout, furnace adopts the heat preservation effect, silicon carbide materials were used, furnace adopts zero chrome aluminum high electric resistance alloy material (0Cr 15Al 5Nb).

#### **A.4 Condenser**

The condenser is a built-in 316 L stainless steel pipe coil, outsourcing 304 stainless steel shell, the bottom has imported condensate and side have condensate inlet, gas interfaces is  $\varnothing 6$  double card sleeve, condensate interfaces are pagoda type.

#### **A.5 Gas-liquid separator**

The gas-liquid separator is made of 316L stainless steel material, upper and lower gas liquid separator have products inlet and outlet, the lower is the condensate inlet. The side has condensate inlet and outlet. The gas interfaces are  $\varnothing 6$  double card sleeve, and condensate interfaces are pagoda type.

#### **A.6 Product collector**

The product collector of 20 ml volume is made of 316 L stainless steel. The interfaces are  $\varnothing 6$  double card sleeve.

#### **A.7 Mass Flowmeter**

- 1).Material: 316L
- 2). Measuring range: 1000 cm<sup>3</sup>
- 3). Proof Pressure: 10 MPa
- 4). Measurement accuracy:  $\pm 1\%$ FS
- 5).Interface:  $\varnothing 6$  Stainless steel pipe proof pressure

## **A.8 Liquid dosing pump**

1  Flow: 0-40 ml/min

2  Liquid road material: 316L

3  Precision: 0.2% relative standard deviation (RSD)
